# Supplementary material for: Predicting the prognosis of glioma patients with TERT promoter mutations and guiding the specific immune profile of immune checkpoint blockade therapy
Source: Aging (Albany NY). 2024 Mar 18;16(6):5618–33. doi: 10.18632/aging.205668 (PMC11006486; doi:10.18632/aging.205668)
Supplement: Supplementary Table 1 [file aging-16-205668-s001.xlsx]

## Sheet: Sheet1
Supplementary Table 1. List of co-upregulated and co-downregulated genes in TERTp-mutated gliomas in the high immune and high stromal groups.
Down-gene	Up-gene
FAM153B	CA3
SLC25A21	HOXA11AS
GLRA1	MYBPH
XKR7	FEZF1
GJD2	LRRC15
GATA5	SHOX2
PAX5	FAM177B
HTR3B	VGLL2
LHX5	CSTA
LHFPL5	AQP5
LOC730811	OTP
FADS6	OTOS
TPH2	GPR157
PAR4	HOXA6
IL1RAPL2	CAPN6
TLX1NB	MAB21L2
G6PC2	CCDC19
HTR1A	SAA2
PROKR2	GPR82
NDST4	SLC9A11
GLRA3	GPR1
GLP1R	HOXD9
ROS1	CASP5
KLK5	PRG2
SYT10	WT1
ESX1	DKKL1
KIAA1486	TREM1
LOC283392	HOXB5
OR14I1	FAM183A
CTXN3	HOXC6
MSX2P1	LOC284276
ZNF99	C2orf70
MCHR2	IDO1
LOC92659	HOXC10
TMC3	HPD
DGKK	MMP7
MYOD1	CATSPER1
OR4N4	C1orf87
	SPAG17
	HOXB8
	NKX2-5
	SIT1
	FCGR2C
	C20orf195
	CD3D
	C15orf48
	LRRC18
	HOXD11
	TREML3
	PADI1
	C1orf110
	HOXC13
	AREG
	HOTAIR
	EOMES
	FOXD3
	GALNT5
	CCR2
	TXNDC3
	SKINTL
	LIMS3
	TIMD4
	SIX6
	TCTEX1D4
	FBXO39
	CEACAM4
	HOXA1
	HOXB3
	EXOC3L2
	KRT80
	YSK4
	GPR18
	WDR38
	IL2RA
	SLAMF1
	KLHDC7A
	TNFSF14
	HOXA13
	CD300LB
	HOXB2
	MMEL1
	CLEC5A
	MIA
	HOXA10
	FAM3D
	PLEK2
	TRPM8
	PI3
	CKM
	CCDC37
	PTPN22
	HOXA7
	ZNF683
	LOC400696
	TNNI2
	HGD
	HDC
	MAP1LC3C
	SCGB1D2
	SVOPL
	C7orf57
	HAND2
	HOXB13
	GBA3
	HOXB6
	CXCL6
	HOXC11
	IL10
	SIRPG
	SLC34A2
	DSG2
	SERPINA5
	C9orf44
	OR51E1
	CCL20
	HOXA2
	CD80
	IBSP
	MACC1
	TREML2
	GPR141
	CD40LG
	HOXA4
	POSTN
	C3orf16
	FAM81B
	OSR2
	HOXD13
	PAX3
	APCDD1L
	C1orf158
	RASEF
	HTRA4
	HLA-DQB2
	GATA4
	HOXB4
	HOXA5
	C6
	HOXA9
	ICOS
	GZMK
	HOXA3
	CD70
	SAA1
	HMGA2
	CHRNA9
	TMEM150B
	AFP
	PTGER1
	CLECL1
	LOC100216001
	KRT75
	KLRB1
	LOC647946
	TNFSF12-TNFSF13
	PYHIN1
	CCDC129
	PLA2G2A
	C11orf88
	HOXD10
	CXCR3
	EMR1
	TRAT1
	SLAMF9
	VSTM1
	KRT7
	UBASH3A
	HOXC8
	TGM5
	HOXC9
	CLEC12A
	CD3G
	C6orf15
	HOXA11
	RBM46
